# Supplementary material for: Antimicrobial Activity of Ceragenins against Vancomycin-Susceptible and -Resistant Enterococcus spp.
Source: MDPI journal article supplement (doi:10.3390/ph16121643), 2023-11-23
Supplement: s1 [file s1]

**Supplement material Table S1: The effects of CSA-44 and CSA-192 against antibacterial activities of vancomycin (Vancomycin susceptible strains)**

| Isolates | Vancomycin alone | MIC values (µg/ml) |                     |
|----------|------------------|--------------------|---------------------|
|          |                  | Vancomycin +CSA-44 | Vancomycin +CSA-192 |
| 1        | 0.5              | 0.5                | 0.5                 |
| 2        | 0.5              | 0.5                | 0.5                 |
| 3        | 1                | 1                  | 0.5                 |
| 4        | 0.5              | 0.5                | 0.5                 |
| 5        | 2                | 0.5                | 0.5                 |
| 6        | 2                | 2                  | 0.5                 |
| 7        | 1                | 0.5                | 0.5                 |
| 8        | 0.5              | 0.5                | 0.5                 |
| 9        | 2                | 1                  | 1                   |
| 10       | 1                | 0.5                | 1                   |
| 11       | 2                | 0.5                | 0.5                 |
| 12       | 0.5              | 0.5                | 0.5                 |
| 13       | 0.5              | 0.5                | 0.5                 |
| 14       | 1                | 1                  | 1                   |
| 15       | 2                | 0.5                | 0.5                 |
| 16       | 0.5              | 0.5                | 1                   |
| 17       | 1                | 1                  | 1                   |
| 18       | 1                | 0.5                | 0.5                 |
| 19       | 0.5              | 0.5                | 0.5                 |
| 20       | 0.5              | 0.5                | 0.5                 |
| 21       | 0.5              | 0.5                | 0.5                 |
| 22       | 1                | 0.5                | 1                   |
| 23       | 1                | 0.5                | 1                   |
| 24       | 2                | 0.5                | 0.5                 |
| 25       | 1                | 0.5                | 1                   |
| 26       | 0.5              | 0.5                | 0.5                 |
| 27       | 0.5              | 0.5                | 0.5                 |
| 28       | 0.5              | 0.5                | 0.5                 |
| 29       | 2                | 0.5                | 0.5                 |
| 30       | 0.5              | 0.5                | 0.5                 |
| 31       | 0.5              | 0.5                | 0.5                 |
| 32       | 1                | 1                  | 0.5                 |
| 33       | 1                | 1                  | 0.5                 |
